# Supplementary material for: Mms1 binds to G-rich regions in Saccharomyces cerevisiae and influences replication and genome stability
Source: PubMed Central journal article supplement — Nucleic Acids Res. 2017 May 23;45(13):7796–806. doi: 10.1093/nar/gkx467 (PMC5570088; doi:10.1093/nar/gkx467), 2017-05-23
Supplement: gkx467_supp.pdf [file gkx467_supp.pdf]

## Supplementary data

### Supplementary data 1: Yeast strains used in this study.

| Strain | Genotype                                                                                                                | Source       |
|--------|-------------------------------------------------------------------------------------------------------------------------|--------------|
| W303   | <i>MATa ura3-1 trp1-1 leu2-3,112 his3-11,15 ade2-1 can1-100 ybp1-1 rad5-535</i>                                         | R. Rothstein |
| KW20   | W303a Pif1-Myc13:: <i>TRP1</i>                                                                                          | (1)          |
| MBY49  | <i>MATa ura3-52 lys2-801_amber ade2-101_ochre trp1Δ63 his3Δ200 leu2Δ1 hxt13::URA3</i>                                   | (2)          |
| SG64   | <i>MATa ura3-52 lys2-801_amber ade2-101_ochre trp1Δ63 his3Δ200 leu2Δ1 hxt13::URA3 prb1::G4(ChrI)-LEU2</i>               | This study   |
| KW95   | W303a Mre11-Myc13:: <i>TRP1</i>                                                                                         | This study   |
| KW109  | W303a Mms1-Myc13:: <i>TRP1</i>                                                                                          | This study   |
| KW110  | <i>MATa ura3-52 lys2-801_amber ade2-101_ochre trp1Δ63 his3Δ200 leu2Δ1 hxt13::URA3 mms1::TRP1</i>                        | This study   |
| KW111  | <i>MATa ura3-52 lys2-801_amber ade2-101_ochre trp1Δ63 his3Δ200 leu2Δ1 hxt13::URA3 prb1::G4(ChrI)-LEU2 mms1::TRP1</i>    | This study   |
| KW136  | W303a Mms1-Myc13:: <i>TRP1 pif1-m2-HIS3</i>                                                                             | This study   |
| KW155  | W303a <i>mms1::TRP1</i>                                                                                                 | This study   |
| KW166  | W303a Mms1-Myc13:: <i>TRP1 rtt101::KANMX4</i>                                                                           | This study   |
| KW168  | W303a Mms1-Myc13:: <i>TRP1 mms22::KANMX4</i>                                                                            | This study   |
| KW178  | W303a Pol2-Myc13:: <i>TRP1</i>                                                                                          | This study   |
| KW190  | W303a Pol2-Myc13:: <i>TRP1 mms1::HIS3</i>                                                                               | This study   |
| KW200  | <i>MATa ura3-52 lys2-801_amber ade2-101_ochre trp1Δ63 his3Δ200 leu2Δ1 hxt13::URA3 prb1::NG(ChrVIII)-LEU2</i>            | This study   |
| KW203  | <i>MATa ura3-52 lys2-801_amber ade2-101_ochre trp1Δ63 his3Δ200 leu2Δ1 hxt13::URA3 prb1::GR(ChrI)-LEU2</i>               | This study   |
| KW208  | <i>MATa ura3-52 lys2-801_amber ade2-101_ochre trp1Δ63 his3Δ200 leu2Δ1 hxt13::URA3 prb1::NG(ChrVIII)-LEU2 mms1::TRP1</i> | This study   |
| KW220  | <i>MATa ura3-52 lys2-801_amber ade2-101_ochre trp1Δ63 his3Δ200 leu2Δ1 hxt13::URA3 prb1::GR(ChrI)-LEU2 mms1::TRP1</i>    | This study   |
| KW231  | W303a Mms1-Myc13:: <i>TRP1 Pol2-HA::HIS3 bar1::KANMX6</i>                                                               | This study   |
| KW232  | W303a Pif1-Myc13:: <i>TRP1 mms1::HIS3</i>                                                                               | This study   |
| KW240  | W303a Mre11-Myc13:: <i>TRP1 mms1::HIS3</i>                                                                              | This study   |
| KW256  | <i>MATa ura3-52 lys2-801_amber ade2-101_ochre trp1Δ63 his3Δ200 leu2Δ1 hxt13::URA3 prb1::LEU2</i>                        | This study   |
| KW261  | <i>MATa ura3-52 lys2-801_amber ade2-101_ochre trp1Δ63 his3Δ200 leu2Δ1 hxt13::URA3 prb1::LEU2 mms1::HIS3</i>             | This study   |
| KP808  | W303a Pol2-Myc13:: <i>TRP1 rtt1o1::URA3</i>                                                                             | This study   |
| KP809  | W303a Mms1-Myc13:: <i>TRP1 rtt101::KANMX4 mms22 HIS3</i>                                                                | This study   |
| KP810  | W303a Pol2-Myc13:: <i>TRP1 rtt101:URA mms22::HIS3</i>                                                                   | This study   |
| KP811  | W303a Mms1-Myc13:: <i>TRP1, G4 Chr IV mut-LoxP</i>                                                                      | This study   |
| KP812  | W303a Pol2-Myc13:: <i>TRP1, G4 Chr IV mut-LoxP</i>                                                                      | This study   |
| KP813  | W303a Pol2-Myc13:: <i>TRP1 mms1::HIS3, G4 Chr IV mut-LoxP</i>                                                           | This study   |

**Supplementary data 2: DNA fragment sizes before ChIPseq and conventional ChIP.** (A,B) DNA fragment sizes after sonication of the Myc-tagged Mms1 (A, lane 2) and untagged (B, lane 1) strain used for ChIPseq analysis and DNA ladder (lane 1 and lane 2 respectively). (C) DNA fragment sizes after sonication of the Myc-tagged Mms1 (lane 2) and untagged (lane 3) strain used for conventional ChIP analysis and DNA ladder (lane 1). Each DNA was separated on a 2% agarose gel.

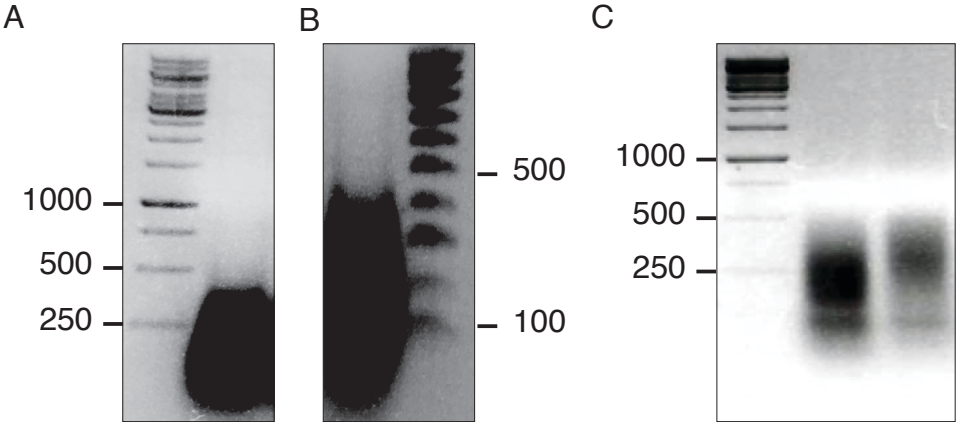

### Supplementary data 3: Primers used in this study for qPCR.

| Region                         | (G <sub>4tract3</sub> ) motif (3) | (G <sub>4tract2</sub> ) motif on leading strand | (G <sub>4tract2</sub> ) motif on lagging strand | Peak-call | Sequence (5'–3')             | Source     |
|--------------------------------|-----------------------------------|-------------------------------------------------|-------------------------------------------------|-----------|------------------------------|------------|
| ChrI <sub>NC</sub> fw          | +                                 | +                                               | -                                               | -         | TCGTATACATGCCGAGTAG          | This study |
| ChrI <sub>NC</sub> rev         | +                                 | +                                               | -                                               | -         | GTTACCACAGAATTGAACTG         | This study |
| ChrIV <sub>ARO1</sub> fw       |                                   |                                                 |                                                 |           | TCGTTACAAGGTGATG             | (4)        |
| ChrIV <sub>ARO1</sub> rev      |                                   |                                                 |                                                 |           | AATAGCGGCAACAAC              | (4)        |
| ChrVI <sub>BR</sub> fw         | +                                 | +                                               | +                                               | -         | TGCATAGTTCTTAGGTCTTC         | This study |
| ChrVI <sub>BR</sub> rev        | +                                 | +                                               | +                                               | -         | GTATAGCAGTGACGCGTG           | This study |
| ChrVI <sub>Tel-VI-R</sub> fw   |                                   |                                                 |                                                 |           | ATCATTGAGGATCTATAATC         | (1)        |
| ChrVI <sub>Tel-VI-R</sub> rev  |                                   |                                                 |                                                 |           | CTTCACTCCATTGGC              | (1)        |
| BM VII <sub>BR</sub> fw        | -                                 | +                                               | +                                               | +         | AGTCTAATCTAACTGGTCTG         | This study |
| BM VII <sub>BR</sub> rev       | -                                 | +                                               | +                                               | +         | GCCAAGAAGGCTCTAGAC           | This study |
| ChrIX <sub>BR</sub> fw         | +                                 | +                                               | +                                               | -         | AGAGTCTTTGGCACTGTTG          | This study |
| ChrIX <sub>BR</sub> rev        | +                                 | +                                               | +                                               | -         | ATTATCCCTTAATGGCCTAC         | This study |
| ChrIX <sub>IRNA</sub> fw       |                                   |                                                 |                                                 |           | GAAAGATTGTACGGGAATGG         | (5)        |
| ChrIX <sub>IRNA</sub> rev      |                                   |                                                 |                                                 |           | GCTAATGAACTACTAATGTCTTG<br>C | (5)        |
| ChrX <sub>BR</sub> fw          | +                                 | +                                               | +                                               | +         | CACAAACACATAAACACATAC        | This study |
| ChrX <sub>BR</sub> rev         | +                                 | +                                               | +                                               | +         | CGGATTTCCGATAGTTGTC          | This study |
| ChrXIa <sub>BR</sub> fw        | -                                 | +                                               | +                                               | -         | GGCAACGATAGAACCAATTC         | (1)        |
| ChrXIa <sub>BR</sub> rev       | -                                 | +                                               | +                                               | -         | GCAACCATTATACCATCTCC         | (1)        |
| ChrXIb <sub>BR</sub> fw        | -                                 | -                                               | +                                               | -         | ACTAGGTCTCTTAGCTCTC          | This study |
| ChrXIb <sub>BR</sub> rev       | -                                 | -                                               | +                                               | -         | TTTGAACACGTTCTACGAG          | This study |
| ChrXIc <sub>BR</sub> fw        | +                                 | +                                               | +                                               | +         | CAGTATGAAATTATCCGCTC         | This study |
| ChrXIc <sub>BR</sub> rev       | +                                 | +                                               | +                                               | +         | CACTATGGTGGACAGCTG           | This study |
| ChrXII <sub>rDNA_RFB</sub> fw  |                                   |                                                 |                                                 |           | AAGATGGGTTGAAAGAGAAGGG       | (1)        |
| ChrXII <sub>rDNA_RFB</sub> rev |                                   |                                                 |                                                 |           | TCATATCAAAGGCATGTCTGT        | (1)        |
| ChrXIII <sub>BR</sub> fw       | -                                 | +                                               | +                                               | -         | CCAAACCAGACCAACCATTG         | (1)        |
| ChrXIII <sub>BR</sub> rev      | -                                 | +                                               | +                                               | -         | TGCTGACCACAACGAACC           | (1)        |
| ChrXIII <sub>NC</sub> fw       | +                                 | +                                               | -                                               | -         | GCTTCAGCCTGGGGTAAC           | This study |
| ChrXIII <sub>NC</sub> rev      | +                                 | +                                               | -                                               | -         | GGCACCATTAGATTCACCAC         | This study |
| ChrXIV <sub>NC</sub> fw        | -                                 | -                                               | -                                               | -         | AGTGATTGTGCCGTTATAAC         | This study |
| ChrXIV <sub>NC</sub> rev       | -                                 | -                                               | -                                               | -         | CGGTTCGCACTACGATAC           | This study |
| ChrXV <sub>BR</sub> fw         | +                                 | +                                               | +                                               | -         | ATACGCAGTATGGTGATATC         | This study |
| ChrXV <sub>BR</sub> rev        | +                                 | +                                               | +                                               | -         | GTTTATTGCCGATATACCTC         | This study |

**Supplementary data 4: Binding regions of Mms1 identified by MACS2 'peakcall' command.**

| Peaks from MACS 2.0 |         |         |        |         |        |                 |                 |                 |                                          |
|---------------------|---------|---------|--------|---------|--------|-----------------|-----------------|-----------------|------------------------------------------|
| Chr                 | Start   | End     | Length | Summit  | pileup | LOG10 (p value) | fold_enrichment | LOG10 (p value) | name                                     |
| ChrI                | 112580  | 112785  | 205    | 112690  | 33.00  | 625.095         | 247.853         | 327.508         | peakcall_mms1_default_extsize180_peak_1  |
| ChrI                | 130081  | 130284  | 203    | 130242  | 40.00  | 527.558         | 208.622         | 249.880         | peakcall_mms1_default_extsize180_peak_2  |
| ChrI                | 191965  | 192177  | 212    | 192031  | 40.00  | 809.461         | 266.000         | 481.361         | peakcall_mms1_default_extsize180_peak_3  |
| ChrII               | 193642  | 193822  | 180    | 193769  | 31.00  | 645.572         | 260.302         | 344.464         | peakcall_mms1_default_extsize180_peak_4  |
| ChrII               | 215788  | 215983  | 195    | 215843  | 34.00  | 685.749         | 258.984         | 377.494         | peakcall_mms1_default_extsize180_peak_5  |
| ChrII               | 463749  | 464101  | 352    | 464057  | 28.00  | 749.299         | 303.780         | 429.304         | peakcall_mms1_default_extsize180_peak_6  |
| ChrIII              | 123534  | 123722  | 188    | 123612  | 47.00  | 997.933         | 280.550         | 642.703         | peakcall_mms1_default_extsize180_peak_7  |
| ChrIV               | 427403  | 427648  | 245    | 427568  | 41.00  | 1.393.092       | 395.679         | 984.699         | peakcall_mms1_default_extsize180_peak_8  |
| ChrIV               | 461797  | 462449  | 652    | 462293  | 77.00  | 1.555.914       | 285.887         | 1.121.153       | peakcall_mms1_default_extsize180_peak_9  |
| ChrIV               | 1049062 | 1049304 | 242    | 1049164 | 27.00  | 488.485         | 232.904         | 219.689         | peakcall_mms1_default_extsize180_peak_10 |
| ChrIV               | 1239630 | 1239824 | 194    | 1239696 | 44.00  | 927.112         | 276.729         | 582.947         | peakcall_mms1_default_extsize180_peak_11 |
| ChrIV               | 1251076 | 1251389 | 313    | 1251202 | 45.00  | 1.238.366       | 336.579         | 853.083         | peakcall_mms1_default_extsize180_peak_12 |
| ChrV                | 40469   | 41119   | 650    | 40735   | 38.00  | 1.001.155       | 317.243         | 645.062         | peakcall_mms1_default_extsize180_peak_13 |
| ChrV                | 42006   | 42474   | 468    | 42233   | 42.00  | 1.040.526       | 307.755         | 680.290         | peakcall_mms1_default_extsize180_peak_14 |
| ChrV                | 43222   | 43945   | 723    | 43695   | 72.00  | 1.981.364       | 356.086         | 1.493.835       | peakcall_mms1_default_extsize180_peak_15 |
| ChrV                | 312024  | 312220  | 196    | 312084  | 44.00  | 625.972         | 219.505         | 328.202         | peakcall_mms1_default_extsize180_peak_16 |
| ChrV                | 335544  | 335734  | 190    | 335617  | 40.00  | 405.728         | 184.715         | 160.186         | peakcall_mms1_default_extsize180_peak_17 |
| ChrV                | 396417  | 396611  | 194    | 396505  | 34.00  | 816.523         | 291.130         | 487.064         | peakcall_mms1_default_extsize180_peak_18 |
| ChrV                | 442043  | 442465  | 422    | 442270  | 75.00  | 1.264.826       | 254.802         | 876.649         | peakcall_mms1_default_extsize180_peak_19 |
| ChrV                | 574897  | 575199  | 302    | 575071  | 60.00  | 1.073.506       | 258.619         | 708.690         | peakcall_mms1_default_extsize180_peak_20 |

|         |         |         |     |         |        |           |         |           |                                                  |
|---------|---------|---------|-----|---------|--------|-----------|---------|-----------|--------------------------------------------------|
| ChrVI   | 224946  | 225231  | 285 | 225020  | 44.00  | 816.422   | 255.176 | 487.064   | peakcall_mms1_<br>default_extsize1<br>80_peak_21 |
| ChrVII  | 567184  | 567405  | 221 | 567287  | 38.00  | 718.636   | 253.025 | 403.215   | peakcall_mms1_<br>default_extsize1<br>80_peak_22 |
| ChrVII  | 700602  | 700830  | 228 | 700704  | 50.00  | 1.771.911 | 424.219 | 1.300.422 | peakcall_mms1_<br>default_extsize1<br>80_peak_23 |
| ChrVII  | 794325  | 794519  | 194 | 794426  | 38.00  | 1.242.680 | 377.673 | 856.834   | peakcall_mms1_<br>default_extsize1<br>80_peak_24 |
| ChrVII  | 806449  | 806663  | 214 | 806581  | 36.00  | 1.082.030 | 348.574 | 716.266   | peakcall_mms1_<br>default_extsize1<br>80_peak_25 |
| ChrVII  | 1049534 | 1049759 | 225 | 1049724 | 41.00  | 787.711   | 258.281 | 461.973   | peakcall_mms1_<br>default_extsize1<br>80_peak_26 |
| ChrVII  | 1088958 | 1089156 | 198 | 1089058 | 56.00  | 883.253   | 238.573 | 545.299   | peakcall_mms1_<br>default_extsize1<br>80_peak_27 |
| ChrVIII | 189407  | 189652  | 245 | 189581  | 38.00  | 502.145   | 207.392 | 229.984   | peakcall_mms1_<br>default_extsize1<br>80_peak_28 |
| ChrVIII | 215840  | 216046  | 206 | 215971  | 47.00  | 799.402   | 244.240 | 471.951   | peakcall_mms1_<br>default_extsize1<br>80_peak_29 |
| ChrIX   | 54150   | 54474   | 324 | 54323   | 38.00  | 657.242   | 239.832 | 353.795   | peakcall_mms1_<br>default_extsize1<br>80_peak_30 |
| ChrIX   | 334127  | 334307  | 180 | 334294  | 31.00  | 484.923   | 219.695 | 217.488   | peakcall_mms1_<br>default_extsize1<br>80_peak_31 |
| ChrIX   | 392157  | 392481  | 324 | 392309  | 26.00  | 537.260   | 250.760 | 257.480   | peakcall_mms1_<br>default_extsize1<br>80_peak_32 |
| ChrX    | 121000  | 121236  | 236 | 121088  | 43.00  | 613.254   | 219.159 | 318.162   | peakcall_mms1_<br>default_extsize1<br>80_peak_33 |
| ChrX    | 391940  | 392163  | 223 | 392038  | 45.00  | 663.878   | 224.383 | 359.497   | peakcall_mms1_<br>default_extsize1<br>80_peak_34 |
| ChrX    | 400013  | 400260  | 247 | 400116  | 35.00  | 798.738   | 282.325 | 471.355   | peakcall_mms1_<br>default_extsize1<br>80_peak_35 |
| ChrXI   | 99803   | 99985   | 182 | 99895   | 47.00  | 1.158.282 | 311.415 | 782.455   | peakcall_mms1_<br>default_extsize1<br>80_peak_36 |
| ChrXI   | 380958  | 381322  | 364 | 381207  | 31.00  | 711.099   | 277.528 | 397.450   | peakcall_mms1_<br>default_extsize1<br>80_peak_37 |
| ChrXI   | 519605  | 519853  | 248 | 519720  | 50.00  | 1.436.254 | 353.430 | 1.020.517 | peakcall_mms1_<br>default_extsize1<br>80_peak_38 |
| ChrXII  | 84188   | 84385   | 197 | 84328   | 35.00  | 787.982   | 279.721 | 461.973   | peakcall_mms1_<br>default_extsize1<br>80_peak_39 |
| ChrXII  | 369706  | 369916  | 210 | 369834  | 55.00  | 1.022.171 | 262.313 | 664.327   | peakcall_mms1_<br>default_extsize1<br>80_peak_40 |
| ChrXII  | 451470  | 451833  | 363 | 451826  | 350.00 | 425.587   | 123.512 | 173.564   | peakcall_mms1_<br>default_extsize1<br>80_peak_41 |
| ChrXII  | 452031  | 452232  | 201 | 452047  | 354.00 | 365.961   | 120.950 | 132.597   | peakcall_mms1_<br>default_extsize1<br>80_peak_42 |
| ChrXII  | 455225  | 455521  | 296 | 455258  | 357.00 | 393.367   | 121.972 | 151.503   | peakcall_mms1_                                   |

|         |         |         |     |         |        |           |         |           |                                                  |
|---------|---------|---------|-----|---------|--------|-----------|---------|-----------|--------------------------------------------------|
|         |         |         |     |         |        |           |         |           | default_extsize1<br>80_peak_43                   |
| ChrXII  | 455721  | 456041  | 320 | 455824  | 358.00 | 528.897   | 127.085 | 251.040   | peakcall_mms1_<br>default_extsize1<br>80_peak_44 |
| ChrXII  | 458652  | 459006  | 354 | 458788  | 352.00 | 427.775   | 123.523 | 175.395   | peakcall_mms1_<br>default_extsize1<br>80_peak_45 |
| ChrXII  | 459110  | 459290  | 180 | 459285  | 355.00 | 374.987   | 121.291 | 138.398   | peakcall_mms1_<br>default_extsize1<br>80_peak_46 |
| ChrXII  | 464853  | 465115  | 262 | 464975  | 355.00 | 515.768   | 126.738 | 240.564   | peakcall_mms1_<br>default_extsize1<br>80_peak_47 |
| ChrXII  | 467534  | 468132  | 598 | 467560  | 354.00 | 373.050   | 121.244 | 137.317   | peakcall_mms1_<br>default_extsize1<br>80_peak_48 |
| ChrXII  | 704511  | 704746  | 235 | 704580  | 40.00  | 682.404   | 239.637 | 374.708   | peakcall_mms1_<br>default_extsize1<br>80_peak_49 |
| ChrXII  | 904035  | 904280  | 245 | 904110  | 32.00  | 472.551   | 214.098 | 208.308   | peakcall_mms1_<br>default_extsize1<br>80_peak_50 |
| ChrXII  | 921240  | 921442  | 202 | 921330  | 39.00  | 959.489   | 302.822 | 609.679   | peakcall_mms1_<br>default_extsize1<br>80_peak_51 |
| ChrXII  | 1074796 | 1075077 | 281 | 1074850 | 52.00  | 591.819   | 200.487 | 300.473   | peakcall_mms1_<br>default_extsize1<br>80_peak_52 |
| ChrXIII | 1731    | 1917    | 186 | 1804    | 47.00  | 630.240   | 214.612 | 331.825   | peakcall_mms1_<br>default_extsize1<br>80_peak_53 |
| ChrXIII | 16258   | 16578   | 320 | 16428   | 55.00  | 1.609.468 | 363.317 | 1.165.234 | peakcall_mms1_<br>default_extsize1<br>80_peak_54 |
| ChrXIV  | 494007  | 494211  | 204 | 494082  | 30.00  | 498.671   | 225.984 | 227.759   | peakcall_mms1_<br>default_extsize1<br>80_peak_55 |
| ChrXIV  | 547086  | 547297  | 211 | 547204  | 42.00  | 767.811   | 251.326 | 444.554   | peakcall_mms1_<br>default_extsize1<br>80_peak_56 |
| ChrXIV  | 619048  | 619366  | 318 | 619157  | 37.00  | 561.935   | 222.102 | 276.947   | peakcall_mms1_<br>default_extsize1<br>80_peak_57 |
| ChrXIV  | 631800  | 631983  | 183 | 631871  | 42.00  | 600.525   | 218.798 | 307.301   | peakcall_mms1_<br>default_extsize1<br>80_peak_58 |
| ChrXIV  | 652075  | 652255  | 180 | 652157  | 34.00  | 669.706   | 255.143 | 363.903   | peakcall_mms1_<br>default_extsize1<br>80_peak_59 |
| ChrXV   | 31003   | 31286   | 283 | 31151   | 41.00  | 400.039   | 182.258 | 155.643   | peakcall_mms1_<br>default_extsize1<br>80_peak_60 |
| ChrXV   | 159994  | 160358  | 364 | 160118  | 63.00  | 943.633   | 234.574 | 596.621   | peakcall_mms1_<br>default_extsize1<br>80_peak_61 |
| ChrXV   | 480108  | 480435  | 327 | 480246  | 39.00  | 597.875   | 224.877 | 305.507   | peakcall_mms1_<br>default_extsize1<br>80_peak_62 |
| ChrXV   | 588162  | 588351  | 189 | 588225  | 31.00  | 600.297   | 248.641 | 307.168   | peakcall_mms1_<br>default_extsize1<br>80_peak_63 |
| ChrXV   | 710139  | 710326  | 187 | 710244  | 45.00  | 1.570.881 | 411.661 | 1.133.412 | peakcall_mms1_<br>default_extsize1<br>80_peak_64 |
| ChrXV   | 855669  | 855950  | 281 | 855717  | 20.00  | 418.960   | 239.090 | 169.052   | peakcall_mms1_<br>default_extsize1               |

|        |         |         |     |         |       |           |         |           |                                                  |
|--------|---------|---------|-----|---------|-------|-----------|---------|-----------|--------------------------------------------------|
|        |         |         |     |         |       |           |         |           | 80_peak_65                                       |
| ChrXV  | 1060686 | 1061023 | 337 | 1060915 | 40.00 | 1.470.885 | 423.391 | 1.049.152 | peakcall_mms1_<br>default_extsize1<br>80_peak_66 |
| ChrXV  | 1091099 | 1091289 | 190 | 1091222 | 47.00 | 742.374   | 234.139 | 423.706   | peakcall_mms1_<br>default_extsize1<br>80_peak_67 |
| ChrXVI | 338813  | 339003  | 190 | 338904  | 54.00 | 752.677   | 222.313 | 432.364   | peakcall_mms1_<br>default_extsize1<br>80_peak_68 |
| ChrXVI | 536586  | 536770  | 184 | 536716  | 34.00 | 1.409.377 | 460.031 | 999.169   | peakcall_mms1_<br>default_extsize1<br>80_peak_69 |
| ChrXVI | 922313  | 922518  | 205 | 922398  | 30.00 | 675.542   | 272.462 | 368.757   | peakcall_mms1_<br>default_extsize1<br>80_peak_70 |
| ChrXVI | 945943  | 946241  | 298 | 945944  | 68.00 | 373.205   | 155.965 | 137.412   | peakcall_mms1_<br>default_extsize1<br>80_peak_71 |
| ChrM   | 2467    | 2658    | 191 | 2619    | 40.00 | 1.144.746 | 341.038 | 769.971   | peakcall_mms1_<br>default_extsize1<br>80_peak_72 |
| ChrM   | 6033    | 6275    | 242 | 6176    | 55.00 | 1.609.468 | 363.317 | 1.165.234 | peakcall_mms1_<br>default_extsize1<br>80_peak_73 |
| ChrM   | 15085   | 15328   | 243 | 15173   | 20.00 | 590.802   | 302.739 | 299.602   | peakcall_mms1_<br>default_extsize1<br>80_peak_74 |
| ChrM   | 18607   | 18863   | 256 | 18768   | 28.00 | 910.884   | 354.172 | 568.783   | peakcall_mms1_<br>default_extsize1<br>80_peak_75 |
| ChrM   | 19247   | 19506   | 259 | 19354   | 20.00 | 577.220   | 297.502 | 288.352   | peakcall_mms1_<br>default_extsize1<br>80_peak_76 |
| ChrM   | 24794   | 24974   | 180 | 24909   | 24.00 | 480.983   | 242.098 | 214.714   | peakcall_mms1_<br>default_extsize1<br>80_peak_77 |
| ChrM   | 28759   | 29077   | 318 | 28904   | 17.00 | 982.868   | 522.979 | 630.414   | peakcall_mms1_<br>default_extsize1<br>80_peak_78 |
| ChrM   | 36683   | 36965   | 282 | 36858   | 13.00 | 988.256   | 609.433 | 634.195   | peakcall_mms1_<br>default_extsize1<br>80_peak_79 |
| ChrM   | 37939   | 38414   | 475 | 38264   | 19.00 | 1.601.831 | 831.931 | 1.158.768 | peakcall_mms1_<br>default_extsize1<br>80_peak_80 |
| ChrM   | 40344   | 40537   | 193 | 40405   | 35.00 | 1.058.635 | 348.621 | 695.164   | peakcall_mms1_<br>default_extsize1<br>80_peak_81 |
| ChrM   | 40814   | 41221   | 407 | 40936   | 21.00 | 1.318.506 | 620.844 | 921.853   | peakcall_mms1_<br>default_extsize1<br>80_peak_82 |
| ChrM   | 41557   | 42373   | 816 | 41825   | 19.00 | 1.382.073 | 702.586 | 975.087   | peakcall_mms1_<br>default_extsize1<br>80_peak_83 |
| ChrM   | 43257   | 43661   | 404 | 43513   | 26.00 | 841.561   | 346.917 | 508.972   | peakcall_mms1_<br>default_extsize1<br>80_peak_84 |
| ChrM   | 44087   | 44272   | 185 | 44225   | 18.00 | 690.562   | 362.646 | 381.355   | peakcall_mms1_<br>default_extsize1<br>80_peak_85 |
| ChrM   | 50659   | 50926   | 267 | 50781   | 50.00 | 2.070.018 | 493.880 | 1.566.621 | peakcall_mms1_<br>default_extsize1<br>80_peak_86 |
| ChrM   | 53591   | 53813   | 222 | 53693   | 66.00 | 610.028   | 187.350 | 315.245   | peakcall_mms1_<br>default_extsize1<br>80_peak_87 |

|      |       |       |     |       |       |           |         |           |                                                  |
|------|-------|-------|-----|-------|-------|-----------|---------|-----------|--------------------------------------------------|
| ChrM | 68517 | 68770 | 253 | 68639 | 30.00 | 775.677   | 300.202 | 451.627   | peakcall_mms1_<br>default_extsize1<br>80_peak_88 |
| ChrM | 83902 | 84362 | 460 | 84229 | 49.00 | 1.705.155 | 415.901 | 1.242.801 | peakcall_mms1_<br>default_extsize1<br>80_peak_89 |
| ChrM | 84630 | 84909 | 279 | 84761 | 26.00 | 1.287.038 | 515.339 | 894.333   | peakcall_mms1_<br>default_extsize1<br>80_peak_90 |
| ChrM | 85490 | 85769 | 279 | 85636 | 44.00 | 1.176.328 | 328.041 | 798.103   | peakcall_mms1_<br>default_extsize1<br>80_peak_91 |



**Supplementary data 5: Yeast strains with Myc-tagged Mms1 grow slower than untagged tag wild type cells on MMS-containing media.** Serial dilutions of no Myc tag wild type, Myc-tagged Mms1, and *mms1* cells were spotted on YPD (A) and 0.01% MMS (B) containing media. Cells were diluted at OD 0.8 six times 10-fold. n=1.

A

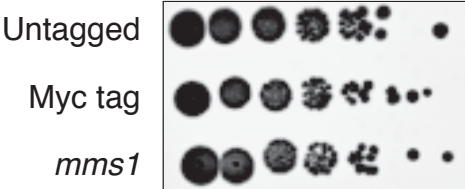

B

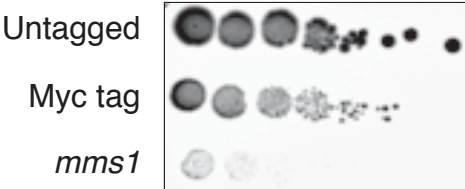

**Supplementary data 6: Characteristics of G4 motifs within qPCR regions.** Strand location and distance to next ARS were used to elucidate if the G4 motif is replicated on the leading or lagging strand.

| Region (Chr)      | Location region |        | Location G4 |        | Strand location | Sequence G4 (5'-3')                                                                                                                       | Location next ARS |        |
|-------------------|-----------------|--------|-------------|--------|-----------------|-------------------------------------------------------------------------------------------------------------------------------------------|-------------------|--------|
|                   | Start           | End    | Start       | End    |                 |                                                                                                                                           | Start             | End    |
| I <sub>NC</sub>   | 61257           | 61473  | 60974       | 61018  | W               | GGGCAGCATCTCCGTGGATTGTTG<br>TGCATGGCCAGTGTCTTGG                                                                                           | 70300             | 70469  |
|                   |                 |        | 61437       | 61493  | W               | GGTGAACGAGTGGGGACAGTTCAAT<br>TCTGTGGTAACAAGGCCACAATTGG<br>TGGTGG                                                                          |                   |        |
|                   |                 |        | 61618       | 61662  | W               | GGGTTACAGATGTCTAGGTTGAATA<br>GCGAGGGTGCCTCCCGTGGG                                                                                         |                   |        |
|                   |                 |        | 61683       | 61712  | W               | GGGTGGGAACGGCGACGGAACCGCG<br>CCGG                                                                                                         |                   |        |
|                   |                 |        | 61836       | 61864  | W               | GGAGGCAGGCTGGGCTTTTTTCGAC<br>GGG                                                                                                          |                   |        |
|                   |                 |        | 61703       | 61753  | C               | CCGCGCCGGTAAATAACGATCCTAA<br>CTATGTGGCCATGTTACGGTGCC                                                                                      |                   |        |
| VI <sub>BR</sub>  | 255397          | 255624 | 255328      | 255355 | W               | GGTCTAAGGTACCAAAATCCGGGG<br>GG                                                                                                            | 256277            | 256431 |
|                   |                 |        | 255498      | 255548 | W               | GGGGCACACGTGCGGGAGTTTCAA<br>GGGGCAGAAATAGTGGGTTACGGGG                                                                                     |                   |        |
|                   |                 |        | 255819      | 255849 | W               | GGTAAGACCAGGTGCAAGGAGAATA<br>CTGGG                                                                                                        |                   |        |
|                   |                 |        | 254976      | 255047 | C               | CCATCAATTCCTTGGGCACATCAGC<br>CATGGAACCCTTTCTAGCCTGTGGT<br>TTCTTTGGACCTAAATGAACC                                                           |                   |        |
|                   |                 |        | 255319      | 255349 | C               | CCTCTCAACGGTCTAAGGTACCAA<br>AATCC                                                                                                         |                   |        |
|                   |                 |        | 255710      | 255757 | C               | CCGTTTTATTCCAACCGGAAATA<br>AATTATTCCTAATAAAATTTCC                                                                                         |                   |        |
| VII <sub>BR</sub> | 806633          | 806696 | 806736      | 806773 | W               | GGTGTTCAGTTTCTGGATGTGTG<br>GGATACGGACGG                                                                                                   | 834491            | 834734 |
|                   |                 |        | 806484      | 806606 | C               | CCAGAACCAGATGGTCTGAAACCGC<br>CACGGCCACCGGAGCGCCACCACG<br>ACCACCGAATCCACGGTTACCGCCA<br>CGACCACCGCCACGACCACCAAAAC<br>CACGGCTACCGCCACGACCACC |                   |        |
|                   |                 |        | 807069      | 807109 | C               | CCAATGACACCACCGATGTGTTTCCA<br>ATTCTTCTTCAACC                                                                                              |                   |        |
| IX <sub>BR</sub>  | 356233          | 356408 | 356335      | 356403 | W               | GGAGACTGATTTGGAGGGTACGGTG<br>GGTAATAAGGAAGGTATCGGGATT<br>GGGGTAGGCCATTAAAGGG                                                              | 357160            | 357396 |
|                   |                 |        | 356572      | 356600 | C               | CCGTAGCCTTTTGGTGTCCCGTAT<br>TCC                                                                                                           |                   |        |
|                   |                 |        | 356762      | 356806 | C               | CCTGTGGAGTGCCCTCGATAGATAG<br>TTTACCCACAAGTTCATCC                                                                                          |                   |        |
| X <sub>BR</sub>   | 391792          | 391919 | 391294      | 391323 | W               | GGTTTCGGGCCAGATTCATGGCCCT<br>GTGG                                                                                                         | 375706            | 376227 |
|                   |                 |        | 391333      | 391368 | C               | CCTACAGACAAAAACCGTTACGTC<br>CCGCCTCACC                                                                                                    |                   |        |
|                   |                 |        | 391531      | 391557 | C               | CCGCGCAAGCCAGATCCAAGCACGC<br>C                                                                                                            |                   |        |
|                   |                 |        | 391854      | 391877 | C               | CCACTATTAGCGCCGTCCGCC                                                                                                                     |                   |        |
|                   |                 |        | 391916      | 391968 | C               | CCGGAGCAACGGGCAACCGTTTGGG<br>GAAAGACCACCCACGCGGATCG<br>CC                                                                                 |                   |        |
|                   |                 |        | 391989      | 392008 | C               | CCCCACACCAGACCTCCC                                                                                                                        |                   |        |
|                   |                 |        | 392394      | 392448 | C               | CCAATTACCATGCCTAAAGAGACCC<br>CTTCCAAAGCTGCTGCCGATGCATT<br>GTCC                                                                            |                   |        |
| XI <sub>aBR</sub> | 142007          | 142159 | 141891      | 141942 | W               | GGTAAAAAGTATCCTGGTCACCGAT<br>GGCCAAGTTACCTTCTGGGGTGATG<br>G                                                                               | 153020            | 153135 |
|                   |                 |        | 141974      | 142008 | W               | GGTGGAGGACCATCGAATTGGAATT<br>GTCTGTTGG                                                                                                    |                   |        |

|                    |        |        |        |        |   |                                                                                                                                                                                                                                                                                              |        |        |
|--------------------|--------|--------|--------|--------|---|----------------------------------------------------------------------------------------------------------------------------------------------------------------------------------------------------------------------------------------------------------------------------------------------|--------|--------|
|                    |        |        | 142127 | 142155 | W | GGAGCTGGAGCTGGAGATGGTATAA<br>TGG                                                                                                                                                                                                                                                             |        |        |
|                    |        |        | 142174 | 142238 | W | GGCTTGGATTGGCCATCAGTGATT<br>TGGGAGACTGGAGCAACAGTAGTAT<br>TGGTGGTGGCTTGG                                                                                                                                                                                                                      |        |        |
|                    |        |        | 142428 | 142487 | W | GGGAGACGGCTGCAGCGGTAGTCTT<br>AGCTGAGGTAGTCTTGGTGGTGGCT<br>TGGATTGG                                                                                                                                                                                                                           |        |        |
|                    |        |        | 142576 | 142595 | W | GGTTTGGTAGTGGCTTGG                                                                                                                                                                                                                                                                           |        |        |
|                    |        |        | 142627 | 142666 | W | GGCTCTCTTAGCCTTGGAGGAAGCA<br>GTAGTGGCAATTGG                                                                                                                                                                                                                                                  |        |        |
|                    |        |        | 141903 | 141949 | C | CCTGGTCACCGATGGCCAAGTTACC<br>TTCTGGGGTGATGGACCAACC                                                                                                                                                                                                                                           |        |        |
|                    |        |        | 142019 | 142055 | C | CCAATTCTACCTTACCCTCAGTCA<br>GGATACCACCC                                                                                                                                                                                                                                                      |        |        |
| XI <sub>bBR</sub>  | 503681 | 503933 | 503309 | 503359 | W | GGAGAATCGAATCCTGGCATTAGTG<br>GGATAAGAATAAAGGCTTCCAAGG                                                                                                                                                                                                                                        | 517017 | 517265 |
|                    |        |        | 503654 | 503686 | W | GGCGGGTTAGTAATGGAGTTAAC<br>TACTAGG                                                                                                                                                                                                                                                           |        |        |
|                    |        |        | 503529 | 503560 | C | CCGTTTCCTTAGCCCAAGAGACCA<br>GTTCCC                                                                                                                                                                                                                                                           |        |        |
|                    |        |        | 504100 | 504138 | C | CCAAAGACTATCTGTCCCAACAATA<br>TTCCCCACATTCC                                                                                                                                                                                                                                                   |        |        |
|                    |        |        | 504279 | 504335 | C | CCTTTGCCATTAAGAGGGCCTCGCT<br>TAACGACCAAAAAATAATCAGCCCA<br>TCTACC                                                                                                                                                                                                                             |        |        |
| XI <sub>cBR</sub>  | 519523 | 519599 | 519028 | 519058 | W | GGTGCCTGGATCTCGAGGCGCGGC<br>ACTGG                                                                                                                                                                                                                                                            | 517017 | 517265 |
|                    |        |        | 519142 | 519185 | W | GGGCAAGTAGGTCTTCTGCACGGC<br>CCGGCCCGGTCTGTGCGG                                                                                                                                                                                                                                               |        |        |
|                    |        |        | 519699 | 519719 | W | GGCGGTCTGTGATGGAAAGG                                                                                                                                                                                                                                                                         |        |        |
|                    |        |        | 519889 | 519957 | W | GGACAAGGTGCTGTCTCCTTGGACT<br>GGTTAGGTCTAGGCGGCTGGGCTTC<br>CATCATGGACATGAACGG                                                                                                                                                                                                                 |        |        |
|                    |        |        | 519018 | 519099 | C | CCTAGTTCCTGGTGCCTGGATCTCG<br>AGGCCGCGGCACTGGAAAAGCCCTT<br>TCTTTCCAGATCGGGAAACCTAAT<br>GAGTCC                                                                                                                                                                                                 |        |        |
|                    |        |        | 519264 | 519304 | C | CCATCTAATGTGTTTCTTCTCGAG<br>ACCTCGGCTCTCCC                                                                                                                                                                                                                                                   |        |        |
|                    |        |        | 519557 | 519637 | C | CCTCCACCGCGTCTTGGCCGCTCC<br>AGCTGTCCACCATAGTGACAACCAC<br>CACCACAACGACAAGCGTGCCGTG<br>TCACC                                                                                                                                                                                                   |        |        |
|                    |        |        | 519676 | 519697 | C | CCAGCTGCCACCACCGCTACC                                                                                                                                                                                                                                                                        |        |        |
|                    |        |        | 519737 | 519832 | C | CCACCCTACTTTGTCTCGACTGC<br>CGCCGCGCTACTACCTCTGCGGCC<br>GCCTTCTTCTCTCTCTTCTCTT<br>CCTCTCTCTCTCTTCTTCC                                                                                                                                                                                         |        |        |
|                    |        |        | 519863 | 519889 | C | CCATTTCTGTCTGATTTCCCATC<br>C                                                                                                                                                                                                                                                                 |        |        |
|                    |        |        | 520009 | 520063 | C | CCAGGTTACGCTAAGACCCAATGGC<br>CTTCTGAACAACCTTCCGATGGTAG<br>ATCC                                                                                                                                                                                                                               |        |        |
| XIII <sub>NC</sub> | 250596 | 250670 | 250258 | 250297 | W | GGTTAATAGACGTGGTAGAGTTCCA<br>CAGGCCAGAATGGG                                                                                                                                                                                                                                                  | 263063 | 263296 |
|                    |        |        | 250327 | 250417 | W | GGCCACTGGCGGTATTGCAGCAGGT<br>GCTGCGGCTACCTCTTCTGGTCTTA<br>GCGGTGGTATGACACCAGGATGGAG<br>CTCCTTCGATGGTGG                                                                                                                                                                                       |        |        |
|                    |        |        | 250442 | 250732 | W | GGAGGCTCAGGTGGTGGCGGTGTCT<br>CCTCATGGGGTGGTGGTCTTCCACTG<br>GGGTGGCCAAGGTAATGGAGGTGCA<br>TCCGCTTGGGGCGGTGCTGGCGGCG<br>GTGCCTCAGCTTGGGGCGGCAAGG<br>TACTGGTGTACTTCTACTTGGGGT<br>GGTGCTCAGCCTGGGGTAACAAAT<br>CAAGTTGGGGCGGTGCATCCACTTG<br>GGCGTCGGGTGGTGAATCTAATGGT<br>GCCATGTCTACTTGGGGTGGTACCG |        |        |

|                    |        |        |        |        |   |                                                                        |        |        |
|--------------------|--------|--------|--------|--------|---|------------------------------------------------------------------------|--------|--------|
|                    |        |        |        |        |   | GTGATAGGTCAGCCTACGGCGGGC<br>TTCCACCTGGGGAGG                            |        |        |
|                    |        |        | 250760 | 250822 | W | GGCGGAGCTTCTGCATGGGGTAACC<br>AAGACGATGGAAATAGGTCTGCTTG<br>GAACAACCAAGG |        |        |
|                    |        |        | 250838 | 250861 | W | GGTGGTAACAGTACATGGGGAGG                                                |        |        |
|                    |        |        | 250280 | 250331 | C | CCACAGGCCAGAATGGGCCAAGTT<br>ACGTCAGTGCCCCAAGAAACATGGC<br>C             |        |        |
|                    |        |        | 250689 | 250724 | C | CCGGTGATAGGTCAGCCTACGGCGG<br>GGCTTCCACC                                |        |        |
| XIII <sub>BR</sub> | 672879 | 673048 | 673216 | 673259 | W | GGTGATGGGGTGTCTGGAGTGGATT<br>CCAAAACGGCATTAAACGG                       | 649309 | 649552 |
|                    |        |        | 673509 | 673530 | W | GGAAGTGGCTGGCTTCTCTGG                                                  |        |        |
|                    |        |        | 672461 | 672483 | C | CCAAATAGCCTGAGTTACCACC                                                 |        |        |
|                    |        |        | 672802 | 672848 | C | CCGATTTCAGAACCACCACGGGATT<br>GCCAACCACACATATCCTTCC                     |        |        |
|                    |        |        | 672878 | 672894 | C | CCAAACCAGACCAACC                                                       |        |        |
| XIV <sub>NC</sub>  | 88913  | 89103  | 88727  | 88775  | W | GGGTTTTAATGTGGTAAACAAGATG<br>GCCCTTACGGGGCTCTTAGTGGG                   | 89531  | 89804  |
|                    |        |        | 88907  | 88950  | C | CCCTAAGTGATTGTGCCGTTATAAC<br>TTCCATTTCGGGTGATACC                       |        |        |
| XV <sub>BR</sub>   | 318817 | 318975 | 318436 | 318471 | W | GGCACAAGCTCAGGCTCAGGCACAG<br>GCACAGGTGG                                | 309359 | 309925 |
|                    |        |        | 319281 | 319318 | W | GGTTGGACATCCTGTATGGGCTTC<br>CGAAGATTCGGG                               |        |        |
|                    |        |        | 318523 | 318565 | C | CCATCCTTCTAACCAGGTATTCCA<br>CAGCAAACCTGCCTCC                           |        |        |
|                    |        |        | 318581 | 318614 | C | CCTCCAACAACGGTTCGACCGTAC<br>ATGAAGCC                                   |        |        |
|                    |        |        | 318638 | 318661 | C | CCACCCCACTTCATGCCCTTACC                                                |        |        |
|                    |        |        | 318863 | 318902 | C | CCTAGCATTGTGCCTGTGGTCCCTG<br>AACCCACTGAGCCC                            |        |        |

**Supplementary data 7: Sequences of oligodeoxynucleotides used for folding and CD.**

| Name  | Feature                    | Region                | Sequence (5'-3')                                  |
|-------|----------------------------|-----------------------|---------------------------------------------------|
| KW336 | MEME motif lagging strand  | ChrVII <sub>BR</sub>  | GGTCGTGGCGGTAGCCGTGG                              |
| KW341 | G4 motif lagging strand    | ChrXI <sub>BR</sub>   | GGTGGTATCCTGACTGACGGTAAAGG                        |
| KW342 | no G4 motif lagging strand | ChrXIII <sub>NC</sub> | GGTGGAAGCCCCGCCGTAGGCTGACCTATCACCGG               |
| KW399 | no G4 motif lagging strand | ChrI <sub>NC</sub>    | GGCACCGTAACATGGCCCACAATAGTTAGGATCGTTATTAACCGGCGGG |
| KW400 | G4 motif lagging strand    | ChrXV <sub>BR</sub>   | GGCACAAGCTCAGGCTCAGGCACAGGCACAGGTGG               |

**Supplementary data 8: Mms1 binds independent of Rtt101 or Mms22 to G-rich regions.** (A) Western blot analysis of Myc-tagged Mms1 protein levels in G1, S and G2 phase. Hsp60 serves as a loading control. N=3 biological replicates. Mms1 protein is present in all cell cycle phases but peaks in G1 phase (quantifications see Figure 2B). (B) FACS analysis of yeast cells arrested in G1, S and G2 phase used for conventional ChIP analysis. (C) ChIP and qPCR analysis of Mms1-Myc in *rtt101*, *mms22*, and *rtt101 mms22* cells. Plotted are the IP/input values as means  $\pm$  SD. N $\geq$ 3 biological replicates. (D) Western blot analysis of Myc-tagged Mms1 protein levels in wild type (wt), *rtt101* and *mms22* cells. Hsp60 serves as a loading control. N=3 biological replicates. (E) Quantified Myc-tagged Mms1 protein levels in wild type (wt), *rtt101* and *mms22* cells after western blot analysis. Hsp60 was used as a reference protein. Shown are mean Myc-tagged Mms1 levels normalized to Hsp60  $\pm$  SD. N=3 biological replicates.

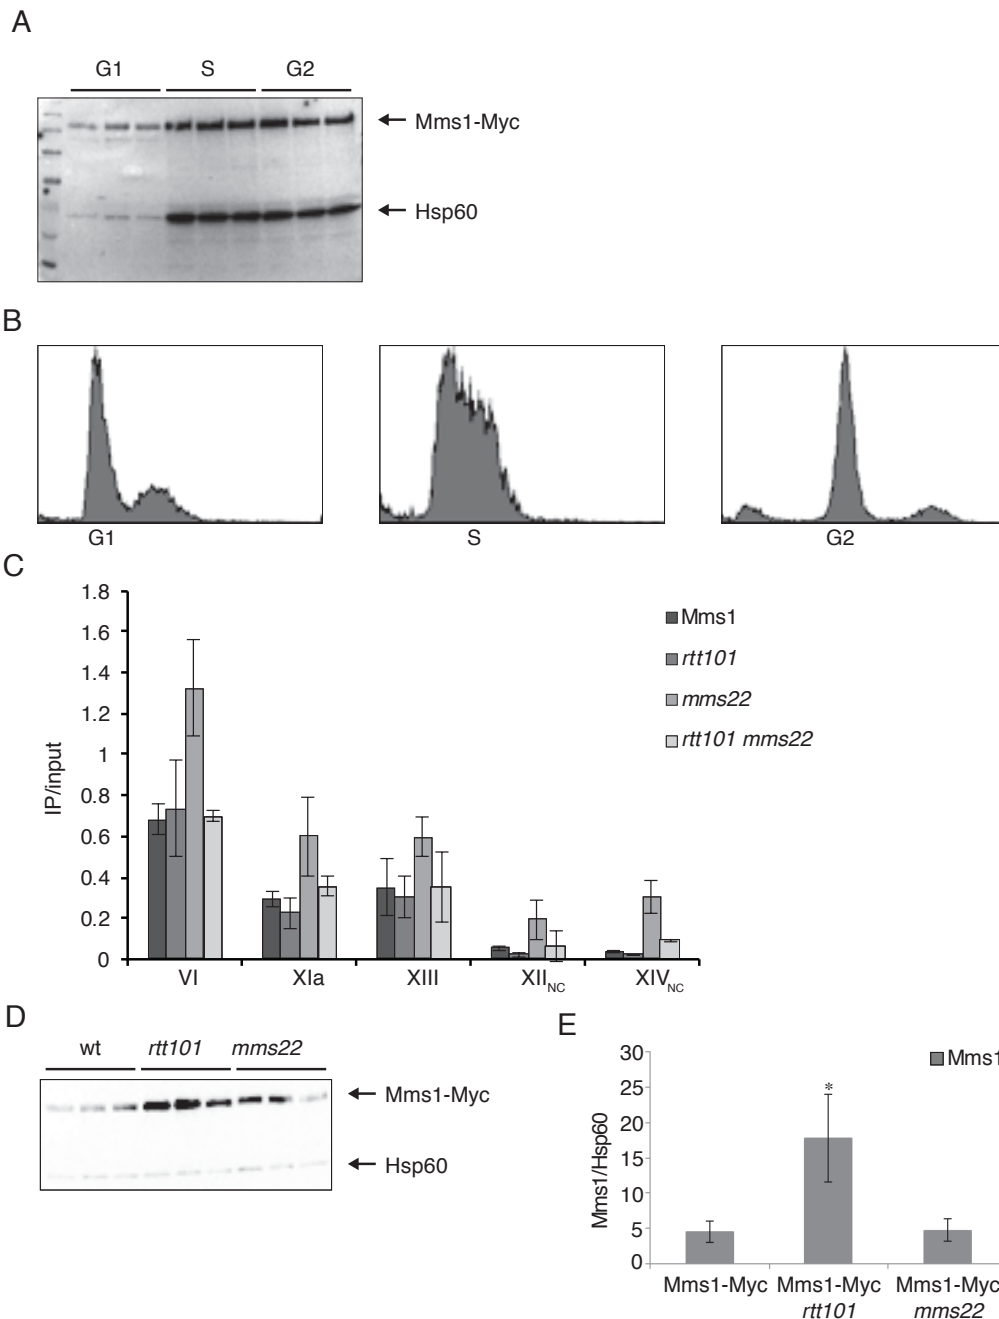

**Supplementary data 9: DNA Pol2 levels and occupancy.** (A) Western blot analysis of Myc-tagged DNA Pol2 protein levels in wild type (wt) and *mms1* cells. Hsp60 serves as a loading control. N=3 biological replicates. (B) Quantified Myc-tagged DNA Pol2 protein levels in wild type (wt) and *mms1* cells after western blot analysis. Hsp60 was used as a reference protein. Shown are mean Myc-tagged DNA Pol2 levels normalized to Hsp60  $\pm$  SD. N=3 biological replicates. (C) ChIP analysis of DNA Pol2-Myc in wild type, *rtt101*, *mms22* and *rtt101 mms22* cells. qPCR analysis of DNA Pol2-Myc association at four Mms1 BR and two NC regions. Plotted are the IP/input values as mean value  $\pm$  SD. N $\geq$ 3 biological replicates.

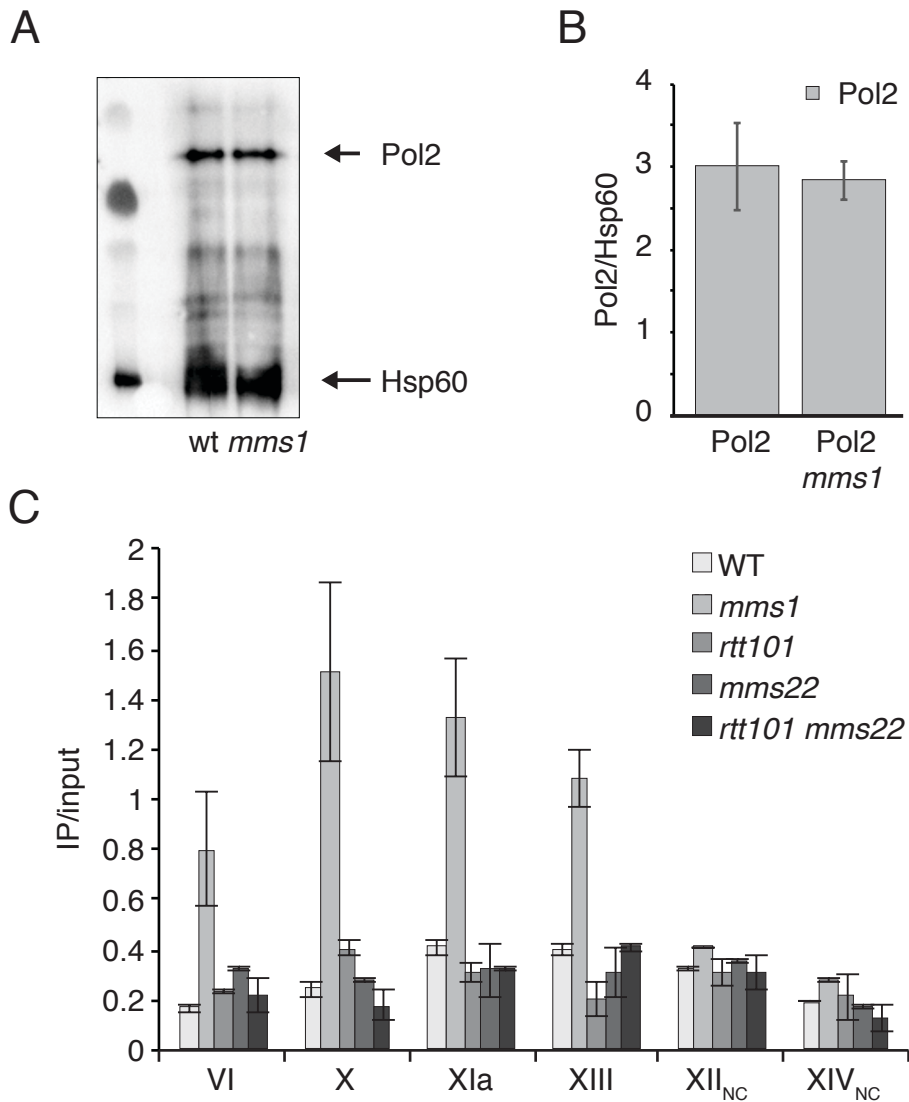

**Supplementary data 10: Mms1 does not recruit Mre11.** Conventional ChIP was performed with Myc-tagged Mre11 in wild type and *mms1* cells. The association of Myc-tagged Mre11 was analyzed by qPCR using primer pairs for the shown regions. Plotted are the IP/input values  $\pm$  SD.  $N \geq 3$  biological replicates.

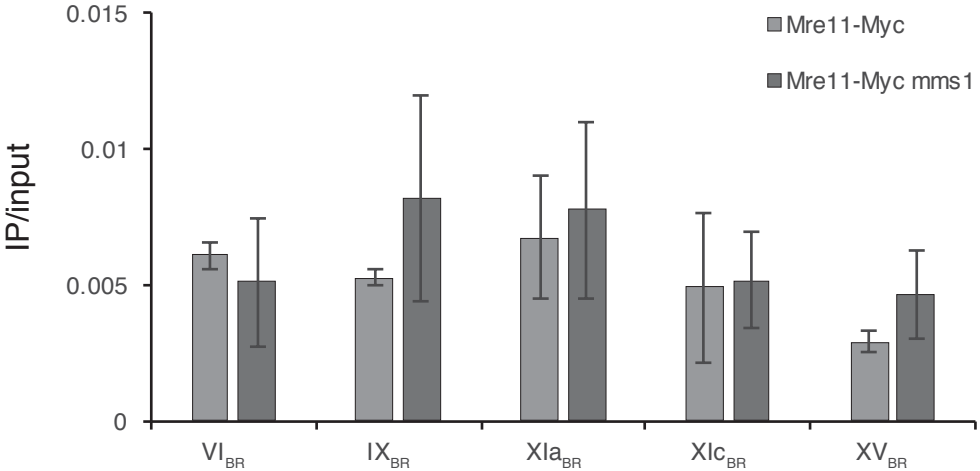



**Supplementary data 11: Mms1 binding regions that overlap Pif1 (1) binding regions.**

| mms1_peak_Chrl | mms1_peak_start | mms1_end | pif1_peak_Chrl | pif1_peak_start_coord | pif1_peak_end_coord |
|----------------|-----------------|----------|----------------|-----------------------|---------------------|
| ChrI           | 112580          | 112785   | ChrI           | 111548                | 114298              |
| ChrI           | 130081          | 130284   | ChrI           | 129548                | 131298              |
| ChrI           | 191965          | 192177   | ChrI           | 189298                | 193548              |
| ChrII          | 463749          | 464101   | ChrII          | 463082                | 464332              |
| ChrIV          | 461797          | 462449   | ChrIV          | 461450                | 461700              |
| ChrIV          | 1239630         | 1239824  | ChrIV          | 1239450               | 1240200             |
| ChrIV          | 1251076         | 1251389  | ChrIV          | 1250700               | 1251700             |
| ChrV           | 40469           | 41119    | ChrV           | 40562                 | 41562               |
| ChrV           | 42006           | 42474    | ChrV           | 40562                 | 41562               |
| ChrV           | 42006           | 42474    | ChrV           | 42812                 | 43562               |
| ChrV           | 43222           | 43945    | ChrV           | 42812                 | 43562               |
| ChrV           | 335544          | 335734   | ChrV           | 333062                | 336812              |
| ChrVI          | 224946          | 225231   | ChrVI          | 224415                | 225415              |
| ChrVII         | 567184          | 567405   | ChrVII         | 567541                | 569041              |
| ChrVII         | 700602          | 700830   | ChrVII         | 700916                | 701166              |
| ChrVII         | 806449          | 806663   | ChrVII         | 806666                | 806916              |
| ChrVIII        | 189407          | 189652   | ChrVIII        | 188763                | 190263              |
| ChrIX          | 54150           | 54474    | ChrIX          | 51865                 | 55115               |
| ChrIX          | 334127          | 334307   | ChrIX          | 333615                | 334365              |
| ChrIX          | 392157          | 392481   | ChrIX          | 389365                | 391365              |
| ChrIX          | 392157          | 392481   | ChrIX          | 392365                | 393115              |
| ChrX           | 121000          | 121236   | ChrX           | 120811                | 121311              |
| ChrX           | 400013          | 400260   | ChrX           | 399561                | 401061              |
| ChrXI          | 380958          | 381322   | ChrXI          | 380319                | 382069              |
| ChrXI          | 519605          | 519853   | ChrXI          | 519444                | 519694              |
| ChrXI          | 519605          | 519853   | ChrXI          | 520319                | 521319              |
| ChrXII         | 84188           | 84385    | ChrXII         | 84818                 | 86318               |
| ChrXII         | 458652          | 459006   | ChrXII         | 459318                | 460818              |
| ChrXII         | 459110          | 459290   | ChrXII         | 459318                | 460818              |
| ChrXII         | 904035          | 904280   | ChrXII         | 902568                | 903068              |
| ChrXII         | 904035          | 904280   | ChrXII         | 903568                | 903818              |
| ChrXII         | 921240          | 921442   | ChrXII         | 920943                | 921193              |
| ChrXIV         | 494007          | 494211   | ChrXIV         | 493616                | 494366              |
| ChrXIV         | 547086          | 547297   | ChrXIV         | 547241                | 547491              |
| ChrXIV         | 652075          | 652255   | ChrXIV         | 650366                | 651366              |
| ChrXV          | 31003           | 31286    | ChrXV          | 28945                 | 31445               |
| ChrXV          | 159994          | 160358   | ChrXV          | 159945                | 160695              |
| ChrXV          | 480108          | 480435   | ChrXV          | 479695                | 480445              |

|        |         |         |        |         |         |
|--------|---------|---------|--------|---------|---------|
| ChrXV  | 480108  | 480435  | ChrXV  | 481070  | 481320  |
| ChrXV  | 710139  | 710326  | ChrXV  | 709570  | 709820  |
| ChrXV  | 1060686 | 1061023 | ChrXV  | 1060570 | 1060820 |
| ChrXVI | 536586  | 536770  | ChrXVI | 536543  | 536793  |
| ChrXVI | 922313  | 922518  | ChrXVI | 921918  | 922918  |

**Supplementary data 12: Mms1 is independent of Pif1.** (A) Conventional ChIP was performed with Myc-tagged Mms1 in wild type and *pif1-m2* cells. The association of Myc-tagged Mms1 was analyzed by qPCR using primer pairs for the shown regions. Plotted are the IP/input values  $\pm$  SD.  $N \geq 3$  biological replicates. (B) Western blot analysis of Myc-tagged Pif1 protein levels in wild type (wt) and *mms1* cells. Hsp60 serves as a loading control.  $N=3$  biological replicates. (C) Quantified Myc-tagged Pif1 protein levels in wild type (wt) and *mms1* cells after western blot analysis. Hsp60 was used as a reference protein. Shown are mean Myc-tagged Pif1 levels normalized to Hsp60  $\pm$  SD.  $N=3$  biological replicates.

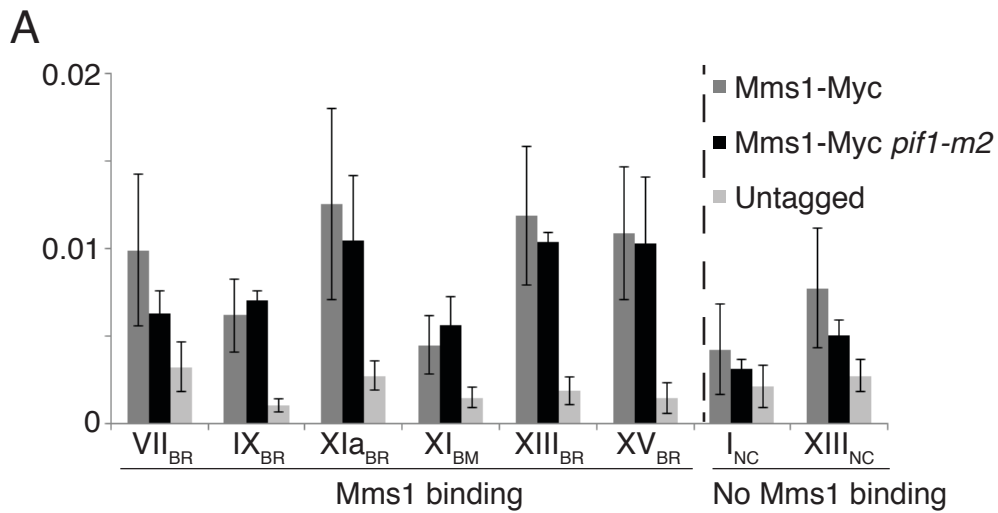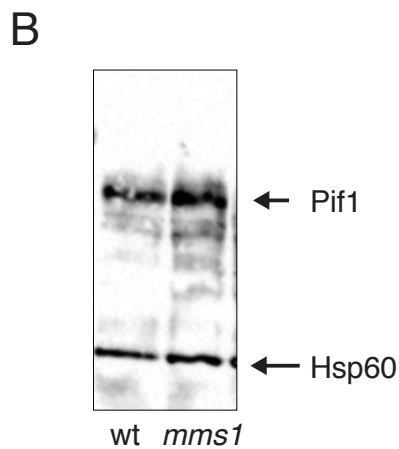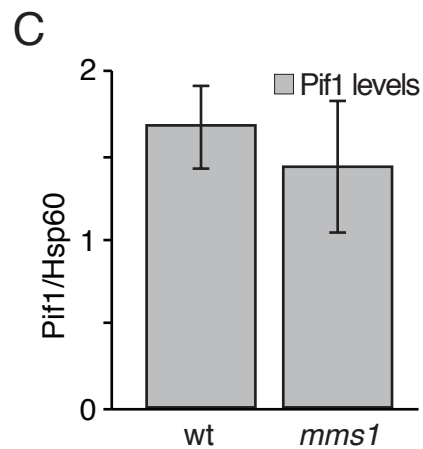

**Supplementary data 13: Affinity purification of MMS1.** Yeast proteins were isolated from the Myc-tagged Mms1 *pif1-m2* strain using the following lysis buffer (0.1 M HEPES pH7.5, 0.01 M potassium acetate, 10% glycerin, 0.5% Nonidet P-40, 1 mM EDTA pH 8.0, 1 mM dithiothreitol, 1  $\mu$ g/ml leupeptin, 1  $\mu$ g/ml aprotinin and 0.5 mM 4-(2-aminoethyl) benzenesulfonyl fluoride hydrochloride). To identify Mms1-Myc interacting to G4 we modified a previous published affinity purification protocol (6). Briefly, dynabeads M-270 streptavidin (Invitrogen) were washed with BS/THES buffer (22 mM Tris-HCl pH 7.5, 10 mM HEPES pH 7.5, 8,9% saccharose, 62 mM NaCl, 5 mM CaCl<sub>2</sub>, 50 mM KCl, 1 mM EDTA pH 8.0, 12% glycerin, 1 mM DTT, 1  $\mu$ g/ml leupeptin (LP), 1  $\mu$ g/ml aprotinin (AP) and 0.5 mM AEBSF). The lysate was cleared by pre-incubation first with avidin and then with the washed beads for 60 min at 4°C. Oligodeoxynucleotides (G4 and mutated G4) were biotinylated (SIGMA) and G4 folding protocols were performed. Dynabeads M-280 streptavidin (Invitrogen) were washed with BW buffer (10 mM Tris-HCl pH 7.5, 1 mM EDTA pH 8.0, 2 M NaCl, 1% 0.1 M phenylmethylsulfonyl fluoride (PMSF)). Beads were mixed with biotinylated DNA (7000 pmol) and incubated for 60 min at room temperature (RT). The immobilized DNA was washed three times with TE. The beads were then blocked with 0.1% (w/v) BSA in 2xBW buffer for 15 min at 4°C. Beads were washed twice with BS/THES buffer and once with 3750  $\mu$ l BS/THES buffer containing 5  $\mu$ g DNA (random oligodeoxynucleotides). Beads were resuspended in BS/THES buffer and incubated with cleared protein lysate, 50 mM potassium acetate and 100 fold excess DNA (compared to bound bait DNA, random oligodeoxynucleotides) for 12 h at 4°C. Beads were washed twice with BS/THES buffer with 5  $\mu$ g PCR product containing G4 motifs followed by five washing steps with BS/THES buffer. The samples were mixed with 6x SDS loading buffer, boiled and loaded onto a 10% SDS PAGE gel. Western blot analysis was performed against Myc-tagged Mms1.

Mms1 co-purifies with G4 structures. Biotinylated control DNA (lane 1-3) as well as biotinylated G4 structures (lane 4-7) were incubated with total yeast cell lysate in which Mms1 was endogenous Myc-tagged and Pif1 was mutated (*pif1-m2*). Western blot analysis, directed against Mms1-Myc, showed that Mms1 co-purifies with G4 structures (lane 4: Chr VI-G4<sub>tract3</sub>, lane 5: Chr IX-G4<sub>tract3</sub>, lane 6: Chr XV-G4<sub>tract2</sub>, lane 7: Chr XIII-G4<sub>tract2</sub>) and not with control DNA (lane 1: G-rich DNA, lane 2: Chr VI-G4<sub>tract3mut</sub>, lane 3: Chr XV-G4<sub>tract2mut</sub>). Arrow indicates Mms1.

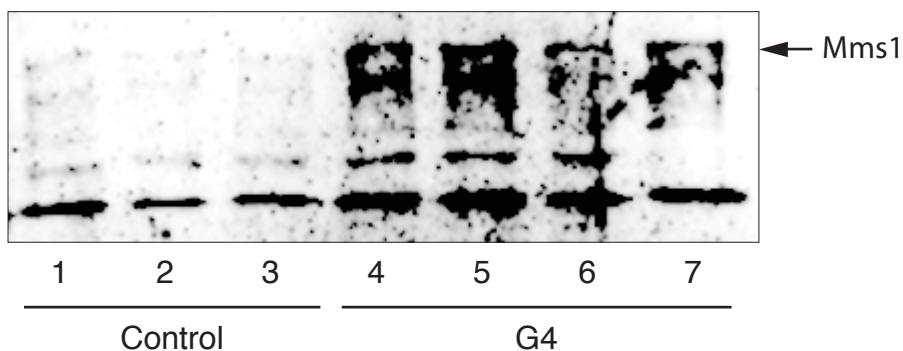

**Supplementary data 14: GCR assay.** (A) Inserts used in the GCR assay. (B) The GCR rate was determined for wild type (wt) and *mms1* cells with an inserted sequence. Shown are mean values  $\pm$  SD as fold enrichment over strain with inserted Leu marker.  $n=7$  biological replicates,  $N \geq 3$ . Statistical significance is noted in the figure. This was determined by student's T-test. \*\*:  $p < 0.01$ .

A

|                                  |                |                                                               |
|----------------------------------|----------------|---------------------------------------------------------------|
| G4 motif (ChrI)<br>(G4-LEU2)     | lagging strand | CCCAACAATTATCTCAA AATTCCCCAATTCTCATCAGTAACACCCCACCCC          |
| Non-G-rich (ChrVII)<br>(NG-LEU2) | lagging strand | CTAATCTTTCAGCGTTGTAAATGTTGGTACCCAAACCCAATTGTCTACAAGTTTCCTTAGC |
| G-rich (ChrI)<br>(GR-LEU2)       | lagging strand | ATGGTGGTCATCTCAGTAGATGTAGAGGTGAAAGTACCGGTCCATGGCTCGGT         |

B

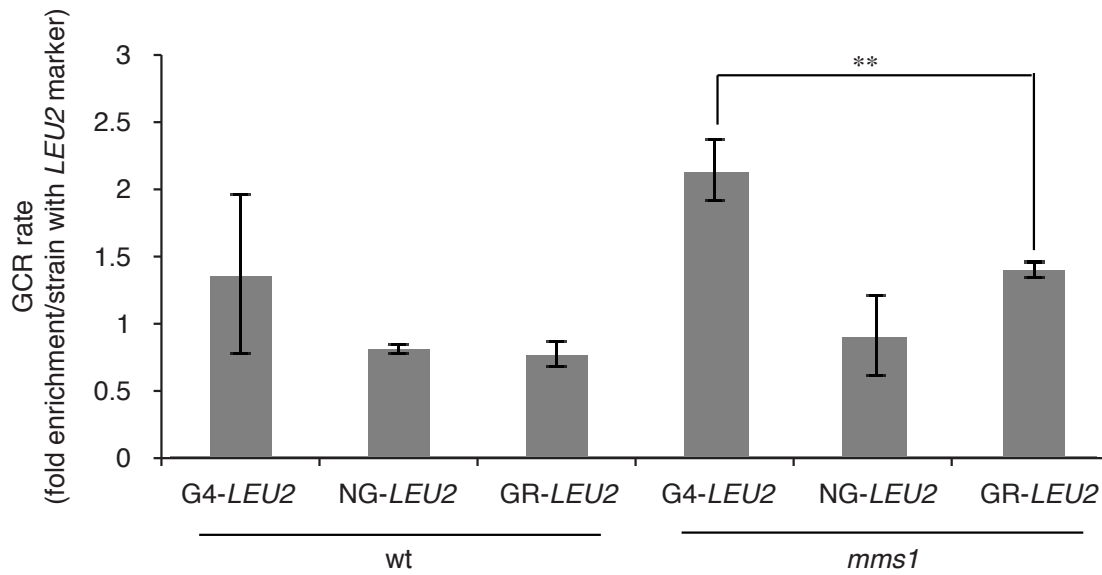

**Supplementary data 15: Immunoprecipitation and mass spectrometry (MS) to identify binding partners of Mms1.**

Protein lysate was prepared from Mms1-Myc and untagged cells according to ChIP analysis (see main script), except another lysis buffer was used (0.1 M HEPES pH7.5, 0.01 M potassium acetate, 10% glycerin, 0.5% Nonidet P-40, 1 mM EDTA pH 8.0, 1 mM dithiothreitol, 1  $\mu$ g/ml leupeptin, 1  $\mu$ g/ml aprotinin and 0.5 mM 4-(2-aminoethyl) benzenesulfonyl fluoride hydrochloride). The samples were treated with DNase and RNase. Incubation with antibody and beads was performed as described for ChIP. After four times wash with PBS, proteins were denatured and submitted to MS analysis. For MS analysis, proteins were reduced in 50 mM DTT for 10 min at 90 °C, and alkylated with 120 mM iodoacetamide for 20 min at RT in the dark. Protein precipitation was performed according to Wessel and Fluegge with chloroform/methanol (7). Precipitated proteins were dissolved in 0.5 % sodium deoxycholate in 100mM ammonium bicarbonate. Digests were performed with trypsin (trypsin-to-protein ratio: 1:100) overnight at 37 °C. SDC was removed by extraction with ethylacetate (8). Peptides were dried in a vacuum concentrator to remove remaining ethylacetate. Peptides were desalted using C18 stage tips (9). Each Stage Tip was prepared with three disks of C18 Empore SPE Disks (3M) in a 200  $\mu$ l pipet tip. Peptides were eluted with 60 % acetonitrile in 0.1 % formic acid, dried in a vacuum concentrator, and stored at -20 °C. Peptides were dissolved in 2 % acetonitrile/0.1 % formic acid prior to nanoLC-MS/MS analysis. NanoLC-MS/MS analyses were performed on an Orbitrap Fusion (Thermo Scientific) equipped with an EASY-Spray Ion Source and coupled to an EASY-nLC 1000 (Thermo Scientific). Peptides were loaded on a trapping column (2 cm x 75  $\mu$ m ID, PepMap C18, 3  $\mu$ m particles, 100 Å pore size) and separated on an EASY-Spray column (50 cm x 75  $\mu$ m ID, PepMap C18, 2  $\mu$ m particles, 100 Å pore size) with a 180-minute linear gradient from 3 % to 40 % acetonitrile and 0.1 % formic acid. Both MS and MS/MS scans were acquired in the Orbitrap analyzer with a resolution of 60,000 for MS scans and 15,000 for MS/MS scans. HCD fragmentation with 35 % normalized collision energy was applied. A Top Speed data-dependent MS/MS method with a fixed cycle time of three seconds was used. Dynamic exclusion was applied with a repeat count of 1 and exclusion duration of 120 seconds; singly charged precursors were excluded from selection. Minimum signal threshold for precursor selection was set to 50,000. Predictive AGC was used with an AGC target value of 5e5 for MS scans and 5e4 for MS/MS scans. EASY-IC was used for internal calibration. Raw MS data files were analyzed with MaxQuant version 1.5.3.12 (10). Database search was performed with Andromeda, which is integrated in the utilized version of MaxQuant. The search was performed against the UniProt *Saccharomyces cerevisiae* (strain S288c) reference proteome database. Additionally, a database containing common contaminants was used. The search was performed with tryptic cleavage specificity with 2 allowed miscleavages. Protein identification was under control of the false-discovery rate (<1% FDR on protein and peptide level). In addition to MaxQuant default settings (e.g. at least 1 razor/unique peptide for identification, 2 allowed miscleavages), the search was performed against following variable modifications: Protein N-terminal acetylation, Gln to pyro-Glu formation (N-term. Q) and oxidation (on Met). For protein quantitation, the LFQ intensities were used (11). Proteins with less than two identified razor/unique peptides were dismissed. Missing LFQ intensities in the control samples were imputed with values close to the baseline if intensities in the corresponding IP samples were present. Data imputation was performed with values from a standard normal distribution with a mean of the 5% quantile of the combined LFQ intensities and a standard deviation of 0.1. Shown are the results of a Mms1 co-immunoprecipitation. Log<sub>2</sub>-ratios of protein intensities (label-free quantitation, LFQ, MaxQuant) from two replicates are plotted against each other. N=2 biological replicates. Missing values in one or both control experiments have been imputed with baseline intensities to allow ratio calculations (open circles). Significance calculations are based on boxplot statistics (grey: not significant (n.s.); blue: one replicate >1.5x interquartile range (IQR),

the other n.s.; orange: >1.5xIQR, only data available from one replicate; red: at least >1.5xIQR in two or >3xIQR in one replicate.

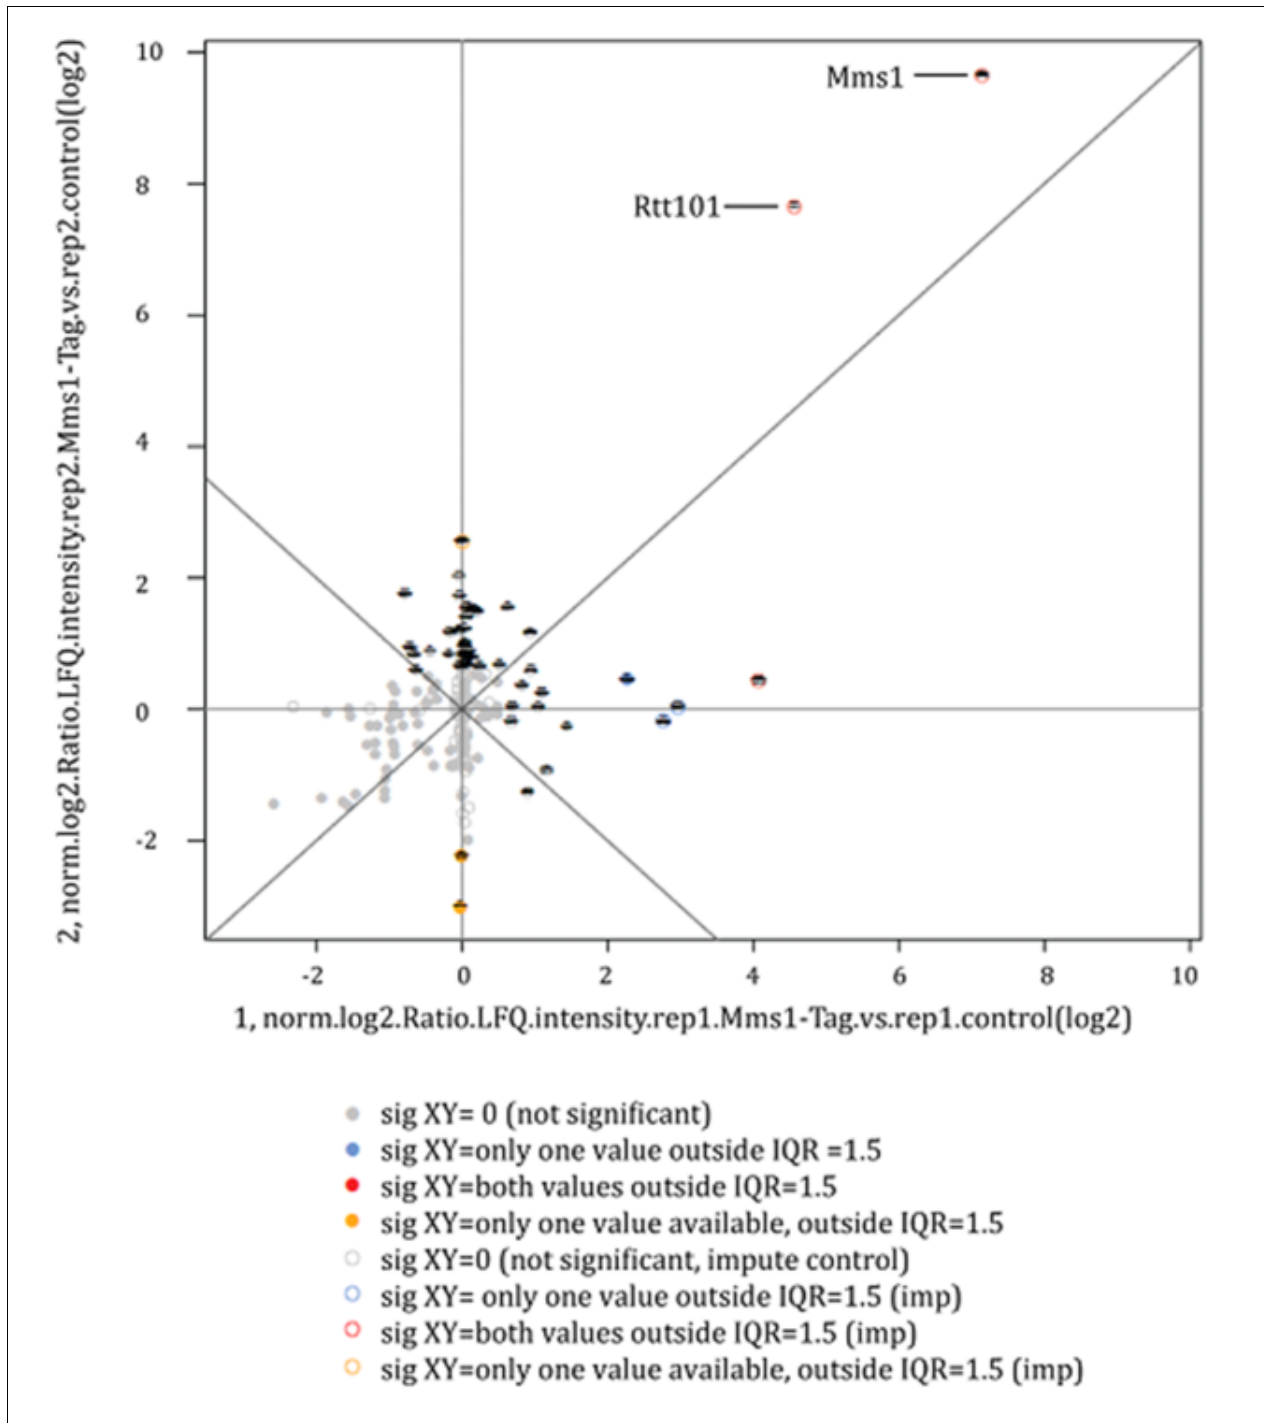

## References

1. Paeschke, K., Capra, J.A. and Zakian, V.A. (2011) DNA Replication through G-Quadruplex Motifs Is Promoted by the *Saccharomyces cerevisiae* Pif1 DNA Helicase. *Cell*, **145**, 678-691.
2. Paeschke, K., Bochman, M.L., Garcia, P.D., Cejka, P., Friedman, K.L., Kowalczykowski, S.C. and Zakian, V.A. (2013) Pif1 family helicases suppress genome instability at G-quadruplex motifs. *Nature*, **497**, 458-462.
3. Capra, J.A., Paeschke, K., Singh, M. and Zakian, V.A. (2010) G-quadruplex DNA sequences are evolutionarily conserved and associated with distinct genomic features in *Saccharomyces cerevisiae*. *PLoS Comput Biol*, **6**, e1000861.
4. Phillips, J.A., Chan, A., Paeschke, K. and Zakian, V.A. (2015) The pif1 helicase, a negative regulator of telomerase, acts preferentially at long telomeres. *PLoS genetics*, **11**, e1005186.
5. Azvolinsky, A., Giresi, P., Lieb, J. and Zakian, V. (2009) Highly transcribed RNA polymerase II genes are impediments to replication fork progression in *Saccharomyces cerevisiae*. *Molecular cell*, **34**, 722-734.
6. Jutras, B.L., Verma, A. and Stevenson, B. (2012) Identification of novel DNA-binding proteins using DNA-affinity chromatography/pull down. *Current protocols in microbiology*, **Chapter 1**, Unit1F 1.
7. Wessel, D. and Flugge, U.I. (1984) A method for the quantitative recovery of protein in dilute solution in the presence of detergents and lipids. *Analytical biochemistry*, **138**, 141-143.
8. Masuda, T., Tomita, M. and Ishihama, Y. (2008) Phase transfer surfactant-aided trypsin digestion for membrane proteome analysis. *Journal of proteome research*, **7**, 731-740.
9. Rappsilber, J., Ishihama, Y. and Mann, M. (2003) Stop and go extraction tips for matrix-assisted laser desorption/ionization, nanoelectrospray, and LC/MS sample pretreatment in proteomics. *Analytical chemistry*, **75**, 663-670.
10. Cox, J. and Mann, M. (2008) MaxQuant enables high peptide identification rates, individualized p.p.b.-range mass accuracies and proteome-wide protein quantification. *Nature biotechnology*, **26**, 1367-1372.
11. Cox, J., Hein, M.Y., Lubner, C.A., Paron, I., Nagaraj, N. and Mann, M. (2014) Accurate proteome-wide label-free quantification by delayed normalization and maximal peptide ratio extraction, termed MaxLFQ. *Molecular & cellular proteomics : MCP*, **13**, 2513-2526.
